# Supplementary material for: A Satellite-Based Tool for Mapping Evaporation in Inland Water Bodies: Formulation, Application, and Operational Aspects
Source: MDPI journal article supplement (doi:10.3390/rs14112636), 2022-05-31
Supplement: s1 [file s1]

Archive with 1 entries (1 files):
- Matta_etal_RS2022_SM.pdf
